1 **Recombinant adjuvanted zoster vaccine and reduced risk of COVID-19 diagnosis**  
2 **and hospitalization in older adults**

3  
4 Katia J. Bruxvoort, PhD,<sup>1,2\*†</sup> Bradley Ackerson, MD,<sup>1†</sup> Lina S. Sy, MPH,<sup>1</sup> Amit Bhavsar,  
5 MBBS, MHA,<sup>3</sup> Hung Fu Tseng, PhD,<sup>1,4</sup> Ana Florea, PhD,<sup>1</sup> Yi Luo, PhD,<sup>1</sup> Yun Tian, MS,<sup>1</sup>  
6 Zendi Solano, BS,<sup>1</sup> Robyn Widenmaier, MBiotech,<sup>5</sup> Meng Shi, MS,<sup>5</sup> Robbert Van Der  
7 Most, PhD,<sup>6</sup> Johannes Eberhard Schmidt, MD, MPH,<sup>7</sup> Jasur Danier, MD,<sup>5</sup> Thomas  
8 Breuer, MD, MSc,<sup>3</sup> Lei Qian, PhD<sup>1</sup>

9  
10 <sup>1</sup>Department of Research & Evaluation, Kaiser Permanente Southern California, 100 S  
11 Los Robles, Pasadena, CA 91101, USA

12 <sup>2</sup>Department of Epidemiology, University of Alabama at Birmingham, 1665 University  
13 Blvd, Birmingham, AL 35233, USA

14 <sup>3</sup>GSK, 20 Avenue Fleming, 1300 Wavre, Belgium

15 <sup>4</sup>Kaiser Permanente Bernard J. Tyson School of Medicine, 98 S. Los Robles Ave.,  
16 Pasadena, CA 91101, USA

17 <sup>5</sup>GSK, 14200 Shady Grove Road, Rockville, MD 20850, USA

18 <sup>6</sup>GSK, 89 Rue de l'Institut, 1330 Rixensart, Belgium

19 <sup>7</sup>GSK, 1 Via Fiorentina, 53100 Siena, Italy

20

21 \*Address for correspondence: [kbruxvoort@uab.edu](mailto:kbruxvoort@uab.edu)

22 †KJB and BA contributed equally to this work.

23

24 **Running Title:** RZV and reduced COVID-19risk

25

26 Dr. Ackerson, Dr. Bruxvoort, Dr. Florea, Dr. Luo, Dr. Qian, Ms. Solano, Ms. Sy, Ms.

27 Tian, and Dr. Tseng received research funding from the GSK group of companies for

28 work related to this paper. Dr. Ackerson, Dr. Bruxvoort, Dr. Qian, Ms. Solano, and Ms.

29 Sy received research funding from Dynavax for work unrelated to this paper. Dr.

30 Ackerson, Dr. Bruxvoort, Dr. Luo, Ms. Sy, and Dr. Tseng received research funding

31 from Seqirus for work unrelated to this paper. Dr. Bruxvoort, Dr. Florea, and Ms. Solano

32 received research funding from Gilead for work unrelated to this paper. Dr. Ackerson,

33 Dr. Bruxvoort, Dr. Florea, Dr. Luo, Dr. Qian, Ms. Sy, Ms. Tian, and Dr. Tseng received

34 research funding from Moderna for work unrelated to this paper. Dr. Ackerson, Dr.

35 Bruxvoort, and Dr. Florea received research funding from Pfizer for work unrelated to

36 this paper. KPSC received consultation fees for Dr. Tseng's consultation work with

37 Johnson and Johnson. Dr. Bhavsar, Ms. Widenmaier, Mr. Shi, Dr. Van Der Most, Dr.

38 Schmidt, Dr. Danier, and Dr. Breuer were employees of the GSK group of companies at

39 the time of the study conduct. Ms. Widenmaier, Dr. Van Der Most, Dr. Schmidt, Dr.

40 Danier, and Dr. Breuer hold shares in the GSK group of companies. All authors do not

41 have any non-financial relationships and activities to declare.

42 This work was supported by GlaxoSmithKline Biologicals SA. Costs associated with

43 manuscript editorial and coordination support were covered by GlaxoSmithKline

44 Biologicals SA.

45

46

47 Corresponding author:

48 Katia Bruxvoort, PhD MPH

49 Department of Epidemiology, University of Alabama at Birmingham, 1665 University

50 Blvd, Birmingham, AL 35233, USA

51 Phone: 205-975-8625

52 Email: [kbruxvoort@uab.edu](mailto:kbruxvoort@uab.edu)

53 **Abstract**

54 **Background:** Vaccines may elicit long-term boosting of innate immune responses that can  
55 help protect against COVID-19. We evaluated the association between recombinant  
56 adjuvanted zoster vaccine (RZV) and COVID-19 outcomes at Kaiser Permanente Southern  
57 California.

58 **Methods:** In a cohort design, adults aged  $\geq 50$  years who received  $\geq 1$  RZV dose prior to  
59 3/1/2020 were matched 1:2 to unvaccinated individuals and followed until 12/31/2020.  
60 Adjusted hazard ratios (aHR) and 95% confidence intervals (CIs) for COVID-19  
61 outcomes were estimated using Cox proportional hazards regression. In a test-negative  
62 design, cases had a positive SARS-CoV-2 test and controls had only negative tests,  
63 from 3/1/2020-12/31/2020. Adjusted odds ratios (aOR) and 95% CIs for prior receipt of  
64 RZV were estimated using logistic regression.

65 **Results:** In the cohort design, 149,244 RZV recipients were matched to 298,488  
66 unvaccinated individuals. The aHRs (95% CI) for COVID-19 diagnosis and  
67 hospitalization were 0.84 (0.81-0.87) and 0.68 (0.64-0.74), respectively. In the test-  
68 negative design, 8.4% of 75,726 test-positive cases and 13.1% of 340,898 test-negative  
69 controls had received  $\geq 1$  RZV dose. The aOR (95% CI) was 0.84 (0.81-0.86).

70 **Conclusion:** RZV vaccination was associated with a 16% lower risk of COVID-19  
71 diagnosis and 32% lower risk of hospitalization, suggesting RZV elicits heterologous  
72 protection, possibly through trained immunity.

73

74 **Keywords:** COVID-19, zoster vaccine, trained immunity, non-specific effects

## 75 **Background**

76 The severe acute respiratory syndrome coronavirus 2 (SARS-CoV-2) that causes  
77 coronavirus disease 2019 (COVID-19) has triggered a global pandemic with over 224  
78 million infections and more than 4.6 million deaths.[1] Despite the extraordinary pace of  
79 COVID-19 vaccine development, nearly 12 months were required to develop, evaluate,  
80 and initiate large-scale production and administration of highly effective vaccines.[2] As  
81 of September 2021, COVID-19 vaccines have been available for over 9 months, but  
82 nearly 58% of the global population remains unvaccinated, despite ongoing efforts to  
83 increase global vaccine production and distribution.[3]

84 Traditionally, immune memory consisting of pathogen-specific cellular and humoral  
85 responses was thought to be the hallmark of the adaptive response. However, a  
86 growing body of evidence suggests that the innate immune system can also develop  
87 and maintain immune memory (i.e. trained immunity), which may be helpful in reducing  
88 the impact of a broad array of infectious diseases.[4-6] Several studies with vaccines,  
89 including the tuberculosis vaccine Bacillus Calmette-Guérin (BCG), and measles, oral  
90 polio, and influenza vaccines, including vaccine adjuvants, demonstrate the ability of the  
91 innate immune system to form memory and to provide non-specific protection against  
92 heterologous infections.[5-9]

93 Recombinant adjuvanted zoster vaccine (RZV) is the first approved and widely used  
94 vaccine with the novel AS01 adjuvant, which elicits an innate immune response and  
95 robust cellular and humoral responses.[10, 11] We hypothesized that RZV could induce  
96 trained immunity that might reduce SARS-CoV-2 infections in older adults, who are at  
97 high risk of severe disease and poor outcomes following SARS-CoV-2 infection.[12]

98 Therefore, we evaluated the association of receipt of RZV with COVID-19 diagnosis and  
99 COVID-19-associated hospitalizations in a large cohort of adults aged  $\geq 50$  years.

## 100 **Methods**

### 101 *Study setting*

102 We employed both matched cohort and test-negative designs in an observational study  
103 conducted at Kaiser Permanente Southern California (KPSC), an integrated health care  
104 system with 15 hospitals and 235 associated medical office buildings. The KPSC  
105 population of over 4.6 million members is stable and mirrors the sociodemographic,  
106 racial, and ethnic diversity of Southern California.[13] KPSC members are incentivized  
107 to seek care within the KPSC system, and recommended vaccinations are proactively  
108 offered free of charge at any visit or at walk-in nurse clinic visits. Comprehensive  
109 electronic health records (EHR) capture all details of patient care, including diagnoses,  
110 vaccinations, procedures, laboratory tests, and pharmacy records. Care received  
111 outside of KPSC is captured through claims.

112 Molecular diagnostic testing for SARS-CoV-2 evolved during the study period (3/1/2020-  
113 12/31/2020). In the early months of the pandemic, testing was prioritized for individuals  
114 with symptoms and prior to hospital admissions or certain outpatient procedures. RT-  
115 PCR was primarily conducted on nasopharyngeal/oropharyngeal swabs using the  
116 Roche cobas<sup>®</sup> SARS-CoV-2 assay on the Roche cobas<sup>®</sup> 6800 and 8800 analyzers  
117 (Roche Molecular Systems, New Jersey, USA) or the Aptima<sup>®</sup> SARS-CoV-2 assay on  
118 Hologic Panther<sup>®</sup> analyzers (Hologic Inc, San Diego, California, USA). However, testing  
119 guidelines were gradually expanded, such that by September 2020 testing was widely  
120 available for symptomatic and asymptomatic individuals for any reason. By November

121 2020, implementation of saliva testing and a new COVID-19 laboratory using the  
122 TaqPath™ COVID-19 High-Throughput Combo Kit on the Thermo Fisher Scientific  
123 Amplitude Solution (Thermo Fisher Scientific, California, USA) increased testing  
124 capacity at KPSC to approximately 52,000 tests per day.

### 125 *Cohort design*

126 The cohort design included individuals aged  $\geq 50$  years as of 3/1/2020 who had at least  
127 1-year prior KPSC membership (allowing for a 31-day gap). Separate analyses were  
128 conducted defining the exposure as either receipt of at least 1 dose of RZV prior to  
129 3/1/2020, receipt of 2 doses of RZV  $\geq 4$  weeks apart prior to 3/1/2020, or receipt of 1  
130 dose of RZV only prior to 3/1/2020. Outcomes were COVID-19 diagnosis, defined as a  
131 positive SARS-CoV-2 molecular test or COVID-19 diagnosis code (**Supplementary**  
132 **Table 1**), and COVID-19 hospitalization, defined as a hospitalization with a SARS-CoV-  
133 2 positive test or a COVID-19 diagnosis, or a hospitalization occurring within 7 days  
134 after a SARS-CoV-2 positive test. We excluded individuals with COVID-19 outcomes  
135 occurring  $\leq 14$  days after receipt of RZV.

136 Recipients of at least 1 dose of RZV as of 3/1/2020 were matched 1:2 with RZV  
137 unvaccinated individuals by age (50-59 years, 60-69 years, 70-79 years, and  $\geq 80$   
138 years), sex, race/ethnicity (non-Hispanic White, non-Hispanic Black, Hispanic, non-  
139 Hispanic Asian, and other/unknown), and zip code. Individuals were followed through  
140 EHR from 3/1/2020 until occurrence of COVID-19 outcomes, termination of  
141 membership, death, receipt of a first dose of RZV for unvaccinated individuals, or end of  
142 the study period (12/31/2020), whichever came first.

143 We identified clinical characteristics in the year prior to 3/1/2020 including: most recent  
144 body mass index (BMI), most recent smoking status, health care utilization (number of  
145 outpatient visits, number of emergency department [ED] visits, number of  
146 hospitalizations), frailty using the algorithm described by Kim et al.,[14] comorbidities  
147 (cardiovascular disease, diabetes, hypertension, pulmonary disease, renal disease,  
148 cancer, autoimmune disease using *International Classification of Diseases Tenth*  
149 *Revision (ICD-10)* codes,[15] and HIV using the KPSC HIV registry), other vaccinations  
150 (influenza, pneumococcal, and tetanus, diphtheria, and acellular pertussis [Tdap]), and  
151 medical center area.

152 We used similar methods for the analysis comparing recipients of at least 1 dose of  
153 RZV and their unvaccinated matches, the analysis comparing recipients of 2 doses of  
154 RZV and their unvaccinated matches, and the analysis comparing recipients of 1 dose  
155 of RZV only and their unvaccinated matches. We first described characteristics of RZV  
156 vaccinated and RZV unvaccinated individuals, reporting absolute standardized  
157 differences (ASD) to assess balance between covariates; characteristics that were  
158 substantially different between RZV vaccinated and unvaccinated groups (ASD >0.1)  
159 were considered potential confounders for inclusion in multivariable analyses. We  
160 calculated incidence rates for COVID-19 outcomes by dividing the number of COVID-19  
161 outcomes by the total number of person-years, and we used the Kaplan-Meier method  
162 to estimate cumulative incidence. Finally, we used Cox proportional hazards regression  
163 to estimate hazard ratios (HR) and 95% confidence intervals (CI) for COVID-19  
164 outcomes comparing RZV vaccinated and unvaccinated individuals, adjusting for  
165 potential confounders. To further control for differences in health care seeking behavior



166 by vaccination status and potential effect modification due to receipt of other vaccines,  
167 sensitivity analyses were conducted to compare the risk of COVID-19 outcomes among  
168 RZV vaccinated and unvaccinated individuals, in a subset of individuals who had  
169 received influenza vaccine but no other vaccines in the year prior to 3/1/2020. Analyses  
170 comparing recipients of at least 1 dose of RZV and their unvaccinated matches were  
171 performed among this subset of individuals.

### 172 *Test-negative design*

173 The test-negative design included all individuals tested for SARS-CoV-2 from 3/1/2020  
174 to 12/31/2020, who had at least 1-year prior membership (allowing for a 31-day gap)  
175 and were aged  $\geq 50$  years as of the SARS-CoV-2 test date. Test-positive cases  
176 comprised individuals with a positive SARS-CoV-2 test, and test-negative controls  
177 comprised those with only negative SARS-CoV-2 tests during the same period. For  
178 individuals with multiple SARS-CoV-2 tests, the test-positive case was defined as the  
179 first positive test for individuals with any positive tests, and the test-negative control was  
180 defined as the first negative test for individuals with only negative tests. Separate  
181 analyses were conducted defining the exposure as either receipt of at least 1 dose of  
182 RZV  $\geq 14$  days prior to the SARS-CoV-2 test or receipt of 2 doses of RZV  $\geq 4$  weeks  
183 apart  $\geq 14$  days prior to the SARS-CoV-2 test. Individuals who received RZV  $< 14$  days  
184 prior to the SARS-CoV-2 test were excluded from the study.

185 We described characteristics of test-positive cases and test-negative controls in the  
186 year prior to their SARS-CoV-2 test date, using similar methods as for the cohort  
187 design. We used logistic regression to estimate odds ratios (OR) and 95% CI comparing  
188 odds of RZV vaccination among test-positive cases and test-negative controls, adjusting

189 for age, sex, race/ethnicity, calendar time, and other confounders based on ASD >0.1.

190 We also conducted analyses stratifying the RZV exposure by time from most recent  
191 RZV dose to SARS-CoV-2 test (15 days to <1 month, 1 to <6 months, 6 months to <1  
192 year, and ≥1 year).

193 The KPSC Institutional Review Board reviewed and approved the study with a waiver  
194 for the requirement of informed consent.

## 195 **Results**

### 196 *Cohort design – receipt of at least 1 dose of RZV*

197 The cohort design with at least 1 dose of RZV as the exposure included 149,244 RZV  
198 vaccinated individuals and 298,488 matched RZV unvaccinated individuals (**Table 1**).  
199 Overall, 16.2% were aged 50-59 years and 12.8% were ≥80 years, 57.8% were female,  
200 and 54.1% were non-Hispanic White. Recipients of at least 1 dose of RZV had less  
201 missing data on BMI (2.6% vs 13.2% of matched RZV unvaccinated individuals, ASD  
202 0.41) and on smoking (2.7% vs 12.7%, ASD 0.39), and had more outpatient visits in the  
203 year prior to 3/1/2020 (39.1% vs 28.8% with ≥11 visits, ASD 0.49). They more  
204 commonly had hypertension (49.0% vs 43.9%, ASD 0.10) and had received other  
205 vaccinations (93.6% vs 73.3%, ASD 0.57) in the year prior. Other characteristics,  
206 including the number of ED visits and hospitalizations, frailty, other comorbidities in the  
207 year prior, and medical center area, were well-balanced between recipients of at least 1  
208 dose of RZV and their RZV unvaccinated matches.

209 Among recipients of at least 1 dose of RZV, there were 5,951 COVID-19 diagnoses and  
210 1,066 COVID-19 hospitalizations, with incidence rates per 1,000 person-years (95% CI)  
211 of 48.82 (47.60-50.08) and 8.69 (8.18-9.23), respectively (**Table 2**). Among RZV

212 unvaccinated individuals matched to recipients of at least 1 dose of RZV, there were  
213 13,028 COVID-19 diagnoses and 2,765 COVID-19 hospitalizations, with incidence rates  
214 per 1,000 person-years of 55.01 (54.07-55.96) and 11.59 (11.17-12.03), respectively. In  
215 Kaplan-Meier analyses, the cumulative incidences of COVID-19 diagnosis and COVID-  
216 19 hospitalization were lower among recipients of at least 1 dose of RZV compared to  
217 their RZV unvaccinated matches (**Figure 1-2**). In fully adjusted analyses, recipients of at  
218 least 1 dose of RZV had a 16% lower rate of COVID-19 diagnosis (HR 0.84 [95% CI:  
219 0.81-0.87]) and a 32% lower rate of COVID-19 hospitalization (HR 0.68 [95% CI: 0.64-  
220 0.74]) compared to RZV unvaccinated individuals (**Table 2**).

221 In sensitivity analyses among the subset of individuals who had received influenza  
222 vaccine but no other vaccines in the year prior to 3/1/2020, we observed similar  
223 reductions in COVID-19 diagnosis and hospitalization among recipients of at least 1  
224 dose of RZV compared to RZV unvaccinated individuals (**Supplementary Table 2**). In  
225 fully adjusted analyses of this subset, recipients of at least 1 dose of RZV had a 17%  
226 lower rate of COVID-19 diagnosis (HR 0.83 [95% CI: 0.78-0.89]) and a 32% lower rate  
227 of COVID-19 hospitalization (HR 0.68 [95% CI: 0.59-0.78]).

#### 228 *Cohort design – receipt of 2 doses of RZV*

229 The cohort design with 2 doses of RZV as the exposure included 94,895 RZV  
230 vaccinated individuals and 189,790 matched RZV unvaccinated individuals  
231 (**Supplementary Table 3**). Differences in characteristics among recipients of 2 doses of  
232 RZV and their RZV unvaccinated matches were similar to the distributions observed for  
233 recipients of at least 1 dose of RZV and their RZV unvaccinated matches.

234 Among recipients of 2 doses of RZV, there were 3,403 COVID-19 diagnoses and 612  
235 COVID-19 hospitalizations, with incidence rates per 1,000 person-years (95% CI) of  
236 43.79 (42.34-45.28) and 7.83 (7.23-8.48), respectively (**Table 3**). Among unvaccinated  
237 individuals matched to recipients of 2 doses of RZV, there were 7,689 COVID-19  
238 diagnoses and 1,676 COVID-19 hospitalizations, with incidence rates per 1,000 person-  
239 years of 51.03 (49.90-52.19) and 11.05 (10.53-11.59), respectively. In Kaplan-Meier  
240 analyses, the cumulative incidences of COVID-19 diagnosis and COVID-19  
241 hospitalization were lower among recipients of 2 doses of RZV compared to their RZV  
242 unvaccinated matches (**Supplementary Figures 1-2**). In fully adjusted analyses, those  
243 who received 2 doses of RZV had a 19% lower rate of COVID-19 diagnosis (HR 0.81  
244 [95% CI: 0.77-0.84]) and a 36% lower rate of COVID-19 hospitalization (HR 0.64 [95%  
245 CI: 0.58-0.70]) (**Table 3**).

#### 246 *Cohort design – receipt of 1 dose of RZV only*

247 The cohort design with 1 dose of RZV only as the exposure included 54,349 RZV  
248 vaccinated individuals and 108,698 matched RZV unvaccinated individuals  
249 (**Supplementary Table 4**). Results of this analysis were similar, but less pronounced,  
250 than results of the analyses for the other exposures (receipt of at least 1 dose of RZV  
251 and receipt of 2 doses of RZV). Recipients of 1 dose of RZV only had a 14% lower rate  
252 of COVID-19 diagnosis (HR 0.86 [95% CI: 0.82-0.91]) and 24% lower rate of COVID-19  
253 hospitalization (HR 0.76 [95% CI: 0.68-0.86]).

#### 254 *Test-negative design*

255 The test-negative design included 75,726 test-positive COVID-19 cases and 340,898  
256 test-negative controls (**Table 4**). Cases were younger than controls (49.0% vs 36.1%

257 ages 50-59 years, ASD 0.31) and less often non-Hispanic White (25.2% vs 43.4%, ASD  
258 0.50). A higher proportion of cases were obese, and a lower proportion of cases were  
259 smokers as compared to controls, but cases also had more missing data for these  
260 variables. Cases also had fewer outpatient and ED visits in the year prior to the SARS-  
261 CoV-2 test date than controls (16.3% vs 27.8% with  $\geq 11$  outpatient visits, ASD 0.36,  
262 and 6.5% vs 9.4% with  $\geq 2$  ED visits, ASD 0.14), were less frail (17.8% vs 26.6% in the  
263 top quartile of the frailty index, ASD 0.21), less commonly had chronic comorbidities  
264 (cardiovascular disease, hypertension, pulmonary disease, renal disease, and cancer),  
265 and less commonly had received other vaccinations in the year prior (68.3% vs 76.7%,  
266 ASD 0.19). There were also significant differences between cases and controls in test  
267 month and medical center area.

268 Of cases and controls, respectively, 8.4% and 13.1% had received at least 1 dose of  
269 RZV, 5.4% and 9.2% had received 2 doses of RZV, and 91.6% and 86.9% were RZV  
270 unvaccinated (**Table 5**). The adjusted ORs (95% CI) comparing cases and controls  
271 were 0.84 (0.81-0.86) for individuals who received at least 1 dose of RZV vs  
272 unvaccinated individuals and 0.82 (0.79-0.85) for individuals who received 2 doses of  
273 RZV vs unvaccinated individuals. Adjusted ORs did not appear to vary substantially by  
274 time since RZV vaccination.

## 275 **Discussion**

276 This large retrospective study spanning the first year of the COVID-19 pandemic  
277 provides evidence from both cohort and test-negative designs that receipt of RZV prior  
278 to the availability of COVID-19 vaccines may have provided benefit in reducing the  
279 burden of COVID-19 in adults aged  $\geq 50$  years. In the cohort design analysis, after

280 adjusting for potential confounders including other vaccinations, we found that the risk  
281 of COVID-19 diagnosis was reduced by 16% among persons who had received at least  
282 1 dose of RZV compared to RZV unvaccinated individuals, an association that was  
283 similar and did not vary by time since most recent RZV dose in the test-negative  
284 analysis. We also found that the risk of hospitalization with COVID-19 was reduced by  
285 32% among recipients of at least 1 dose of RZV compared to RZV unvaccinated  
286 individuals. These results were consistent in the test-negative design (16% lower odds  
287 of RZV vaccination among SARS-CoV-2 test-positive cases versus test-negative  
288 controls).

289 A similar reduction in risk of COVID-19 infection and severe disease has been reported  
290 following receipt of influenza vaccine in several studies [16-18], although this  
291 association was not observed in other studies.[19-23] A prior study at KPSC found a  
292 reduction in risk of COVID-19 diagnosis and severe disease associated with receipt of  
293 13-valent pneumococcal conjugate vaccine (PCV13) but not with receipt of influenza  
294 vaccine.[24] Interestingly, in a sensitivity analysis among the subset of individuals who  
295 received influenza vaccine but no other vaccines, we found that receipt of RZV was still  
296 associated with a similar reduction in risk of COVID-19 diagnosis and hospitalization,  
297 suggesting that influenza vaccination or healthy vaccinee bias had minimal impact on  
298 our findings.

299 While the mechanism for the reduced risk of heterologous infections following receipt of  
300 some vaccines is not clear, it is plausible that these vaccines induce a trained immune  
301 response that results in an improved cytokine response to subsequent exposures; this  
302 response may provide an antiviral effect against infection with SARS-CoV-2 or other

303 viruses.[25] Induction of an innate immune response has been suggested as a means  
304 to control viral replication early in the course of infection to reduce the risk of severe  
305 disease.[4, 9, 25] This may be particularly important for viral infections such as SARS-  
306 CoV-2, which appear to attenuate the host innate immune response as a means of  
307 increasing viral replication, possibly increasing disease severity and enhancing viral  
308 transmission.[26, 27] Notably, induction of innate immunity by highly-effective COVID-  
309 19 vaccines has been proposed as a possible mechanism of early protection following  
310 vaccination prior to the development of a robust adaptive response.[28] Furthermore,  
311 innate immunity has been found to play an important role in the control of infection in  
312 coronavirus animal reservoirs and may similarly contribute to reduced severity of  
313 COVID-19 disease observed in children compared to adults.[29, 30]

314 Our study found a durable reduction in the risk of COVID-19 infection following receipt  
315 of RZV vaccine, consistent with the durable protection against heterologous infections  
316 provided by trained immunity.[9] It is possible that the AS01 adjuvant used in RZV,  
317 which activates innate immune responses including monocytes and the IFN-response  
318 pathways, may be associated with the reduced risk of COVID-19 diagnosis and  
319 hospitalization observed in this study.[10, 11, 31] Influenza and other vaccines may also  
320 induce similar trained immunity against SARS-CoV-2 infection, although the duration  
321 may be variable.[9, 25, 32-34] Additional research is needed to elucidate immunologic  
322 mechanisms for our findings and to explore implications such as trained immunity-  
323 based vaccines that might mitigate serious infections in future pandemics until specific  
324 vaccines become available.[35]

325 Our study had several strengths and limitations. We leveraged comprehensive EHR  
326 data on demographic and clinical characteristics, vaccinations, and COVID-19  
327 outcomes from a large, diverse cohort of adults aged  $\geq 50$  years. Although data for BMI  
328 and smoking status were missing for some individuals, we conducted a sensitivity  
329 analysis limited to individuals without missing data and found similar results. As in all  
330 observational studies, there may be some residual confounding. RZV recipients may  
331 have differed from RZV unvaccinated individuals with respect to health status, health  
332 care seeking behavior, and other factors that might, in part, explain the observed  
333 differences in risk of COVID-19 diagnosis and hospitalization. However, to reduce  
334 potential confounding, we used a cohort design, matching RZV recipients with  
335 unvaccinated individuals on age, sex, race/ethnicity, and zip code, and adjusting for  
336 health care utilization, other vaccinations, and comorbidities. We also used a test-  
337 negative design, which may be less confounded by health care seeking behavior than  
338 the cohort design,[36] but may also be less generalizable given that the study  
339 population was limited to those who were tested for SARS-CoV-2. We observed similar  
340 results using both designs, supporting the validity of the results. In addition, RZV  
341 exposure could be misclassified if individuals were vaccinated outside of KPSC;  
342 however, such misclassification was likely minimal, because KPSC members received  
343 vaccines at KPSC without charge, and providers were required to document previous  
344 receipt of recommended vaccines at all encounters.

345 **Conclusions:**

346 RZV recipients aged  $\geq 50$  years had a reduced risk of COVID-19 diagnosis and  
347 hospitalization compared to RZV unvaccinated individuals, suggesting that RZV may



348 elicit durable innate immune responses that could offer heterologous protection against  
349 COVID-19 infection. While this epidemiological study provides further evidence of the  
350 concept of trained innate immunity using the adjuvanted RZV vaccine, additional  
351 research is needed to identify and understand the underlying non-specific effects of  
352 RZV and other vaccines.

353

### 354 **Acknowledgements**

355 The authors thank the members of Kaiser Permanente for helping to improve care  
356 through the use of information collected through our electronic health record systems.  
357 Editorial and coordination support was provided by Adrian Kremer (Modis c/o GSK).

358

### 359 **Data Sharing Statement**

360 The study details (GSK study number 217021) are available on the GSK Clinical Study  
361 Register and can be accessed at [www.gskclinicalstudyregister.com](http://www.gskclinicalstudyregister.com).

362

363

364 **References:**

- 365 1. WHO Coronavirus (COVID-19) Dashboard. Available at: <https://covid19.who.int/>. Accessed September  
366 14, 2021.
- 367 2. Oliver SE, Gargano JW, Marin M, et al. The Advisory Committee on Immunization Practices' interim  
368 recommendation for use of Pfizer-BioNTech COVID-19 vaccine - United States, December 2020. *MMWR*  
369 *Morb Mortal Wkly Rep* **2020**; 69:1922-4.
- 370 3. Ritchie H, Mathieu E, Rodés-Guirao L, et al. Coronavirus Pandemic (COVID-19). Available at:  
371 <https://ourworldindata.org/coronavirus>. Accessed September 14, 2021.
- 372 4. Benn CS, Netea MG, Selin LK, Aaby P. A small jab - a big effect: nonspecific immunomodulation by  
373 vaccines. *Trends Immunol* **2013**; 34:431-9.
- 374 5. Goodridge HS, Ahmed SS, Curtis N, et al. Harnessing the beneficial heterologous effects of  
375 vaccination. *Nat Rev Immunol* **2016**; 16:392-400.
- 376 6. Wimmers F, Donato M, Kuo A, et al. The single-cell epigenomic and transcriptional landscape of  
377 immunity to influenza vaccination. *Cell* **2021**; 184:3915-35 e21.
- 378 7. Kleinnijenhuis J, Quintin J, Preijers F, et al. Bacille Calmette-Guerin induces NOD2-dependent  
379 nonspecific protection from reinfection via epigenetic reprogramming of monocytes. *Proc Natl Acad Sci*  
380 *U S A* **2012**; 109:17537-42.
- 381 8. Moorlag SJCFM, Arts RJW, van Crevel R, Netea MG. Non-specific effects of BCG vaccine on viral  
382 infections. *Clin Microbiol Infect* **2019**; 25:1473-8.
- 383 9. Netea MG, Dominguez-Andres J, Barreiro LB, et al. Defining trained immunity and its role in health  
384 and disease. *Nat Rev Immunol* **2020**; 20:375-88.
- 385 10. Coccia M, Collignon C, Herve C, et al. Cellular and molecular synergy in AS01-adjuvanted vaccines  
386 results in an early IFN $\gamma$  response promoting vaccine immunogenicity. *NPJ Vaccines* **2017**; 2:25.

- 387 11. Hastie A, Catteau G, Enemu A, et al. Immunogenicity of the adjuvanted recombinant zoster vaccine:  
388 persistence and anamnestic response to additional doses administered 10 years after primary  
389 vaccination. *J Infect Dis* **2020**;jjaa300.
- 390 12. Petrilli CM, Jones SA, Yang J, et al. Factors associated with hospital admission and critical illness  
391 among 5279 people with coronavirus disease 2019 in New York City: prospective cohort study. *BMJ*  
392 **2020**; 369:m1966.
- 393 13. Koebnick C, Langer-Gould AM, Gould MK, et al. Sociodemographic characteristics of members of a  
394 large, integrated health care system: comparison with US Census Bureau data. *Perm J* **2012**; 16:37-41.
- 395 14. Kim DH, Schneeweiss S, Glynn RJ, Lipsitz LA, Rockwood K, Avorn J. Measuring frailty in medicare  
396 data: development and validation of a claims-based frailty index. *J Gerontol A Biol Sci Med Sci* **2018**;  
397 73:980-7.
- 398 15. Quan H, Sundararajan V, Halfon P, et al. Coding algorithms for defining comorbidities in ICD-9-CM  
399 and ICD-10 administrative data. *Med Care* **2005**; 43:1130-9.
- 400 16. Conlon A, Ashur C, Washer L, Eagle KA, Hofmann Bowman MA. Impact of the influenza vaccine on  
401 COVID-19 infection rates and severity. *Am J Infect Control* **2021**; 49:694-700.
- 402 17. Fink G, Orlova-Fink N, Schindler T, et al. Inactivated trivalent influenza vaccination is associated with  
403 lower mortality among patients with COVID-19 in Brazil. *BMJ Evid Based Med* **2020**:bmjebm-2020-  
404 111549.
- 405 18. Huang K, Lin SW, Sheng WH, Wang CC. Influenza vaccination and the risk of COVID-19 infection and  
406 severe illness in older adults in the United States. *Sci Rep* **2021**; 11:11025.
- 407 19. Belingheri M, Paladino ME, Latocca R, De Vito G, Riva MA. Association between seasonal flu  
408 vaccination and COVID-19 among healthcare workers. *Occup Med (Lond)* **2020**; 70:665-71.
- 409 20. Zein J, Whelan G, Erzurum S. Safety of influenza vaccine during COVID-19. *J Clin Transl Sci* **2021**;  
410 5:E49.

- 411 21. Kissling E, Hooiveld M, Brytting M, et al. Absence of association between 2019-20 influenza  
412 vaccination and COVID-19: results of the European I-MOVE-COVID-19 primary care project, March-  
413 August 2020. *Influenza Other Respir Viruses* **2021**; 15:429-38.
- 414 22. Martinez-Baz I, Trobajo-Sanmartin C, Arregui I, et al. Influenza vaccination and risk of SARS-CoV-2  
415 infection in a cohort of health workers. *Vaccines (Basel)* **2020**; 8:611.
- 416 23. Pedote PD, Termite S, Gigliobianco A, Lopalco PL, Bianchi FP. Influenza vaccination and health  
417 outcomes in COVID-19 patients: a retrospective cohort study. *Vaccines (Basel)* **2021**; 9:358.
- 418 24. Lewnard JA, Bruxvoort KJ, Fischer H, et al. Prevention of COVID-19 among older adults receiving  
419 pneumococcal conjugate vaccine suggests interactions between *Streptococcus pneumoniae* and SARS-  
420 CoV-2 in the respiratory tract. *J Infect Dis* **2021**:jiab128.
- 421 25. Chumakov K, Avidan MS, Benn CS, et al. Old vaccines for new infections: exploiting innate immunity  
422 to control COVID-19 and prevent future pandemics. *Proc Natl Acad Sci U S A* **2021**; 118:e2101718118.
- 423 26. Lei X, Dong X, Ma R, et al. Activation and evasion of type I interferon responses by SARS-CoV-2. *Nat*  
424 *Commun* **2020**; 11:3810.
- 425 27. Yuen CK, Lam JY, Wong WM, et al. SARS-CoV-2 nsp13, nsp14, nsp15 and orf6 function as potent  
426 interferon antagonists. *Emerg Microbes Infect* **2020**; 9:1418-28.
- 427 28. Sadarangani M, Marchant A, Kollmann TR. Immunological mechanisms of vaccine-induced protection  
428 against COVID-19 in humans. *Nat Rev Immunol* **2021**; 21:475-84.
- 429 29. Silverstein NJ, Wang Y, Manickas-Hill Z, et al. Innate lymphoid cells and disease tolerance in SARS-  
430 CoV-2 infection [Preprint]. July 4, 2021 [Cited September 14, 2021] Available from:  
431 <https://doi.org/10.1101/2021011421249839>.
- 432 30. Mallapaty S. Kids and COVID: why young immune systems are still on top. *Nature* **2021**; 597:166-8.
- 433 31. De Mot L, Bechtold V, Bol V, et al. Transcriptional profiles of adjuvanted hepatitis B vaccines display  
434 variable interindividual homogeneity but a shared core signature. *Sci Transl Med* **2020**; 12:eaay8618.

- 435 32. Ragni P, Marino M, Formisano D, et al. Association between exposure to influenza vaccination and  
436 COVID-19 diagnosis and outcomes. *Vaccines (Basel)* **2020**; 8:675.
- 437 33. Escobar LE, Molina-Cruz A, Barillas-Mury C. BCG vaccine protection from severe coronavirus disease  
438 2019 (COVID-19). *Proc Natl Acad Sci U S A* **2020**; 117:17720-6.
- 439 34. O'Neill LAJ, Netea MG. BCG-induced trained immunity: can it offer protection against COVID-19? *Nat*  
440 *Rev Immunol* **2020**; 20:335-7.
- 441 35. Sanchez-Ramon S, Conejero L, Netea MG, Sancho D, Palomares O, Subiza JL. Trained immunity-based  
442 vaccines: a new paradigm for the development of broad-spectrum anti-infectious formulations. *Front*  
443 *Immunol* **2018**; 9:2936.
- 444 36. Ozasa K, Fukushima W. Commentary: Test-negative design reduces confounding by healthcare-  
445 seeking attitude in case-control studies. *J Epidemiol* **2019**; 29:279-81.
- 446
- 447

448

**Table 1. Baseline characteristics of RZV (at least 1 dose) vaccinated and unvaccinated cohort**

|                                          | <b>Vaccinated<br/>(N=149244)</b> | <b>Unvaccinated<br/>(N=298488)</b> | <b>Absolute<br/>Standardized<br/>Difference<sup>d</sup></b> |
|------------------------------------------|----------------------------------|------------------------------------|-------------------------------------------------------------|
|                                          | <b>n (%)</b>                     | <b>n (%)</b>                       |                                                             |
| Age at index date, years                 |                                  |                                    | N/A <sup>c</sup>                                            |
| 50-59                                    | 24169 (16.2)                     | 48338 (16.2)                       |                                                             |
| 60-69                                    | 56047 (37.6)                     | 112094 (37.6)                      |                                                             |
| 70-79                                    | 49986 (33.5)                     | 99972 (33.5)                       |                                                             |
| ≥80                                      | 19042 (12.8)                     | 38084 (12.8)                       |                                                             |
| Sex                                      |                                  |                                    | N/A <sup>c</sup>                                            |
| Female                                   | 86206 (57.8)                     | 172412 (57.8)                      |                                                             |
| Male                                     | 63038 (42.2)                     | 126076 (42.2)                      |                                                             |
| Race/Ethnicity                           |                                  |                                    | N/A <sup>c</sup>                                            |
| Non-Hispanic White                       | 80743 (54.1)                     | 161486 (54.1)                      |                                                             |
| Non-Hispanic Black                       | 8411 (5.6)                       | 16822 (5.6)                        |                                                             |
| Hispanic                                 | 30376 (20.4)                     | 60752 (20.4)                       |                                                             |
| Non-Hispanic Asian                       | 24434 (16.4)                     | 48868 (16.4)                       |                                                             |
| Other/Unknown                            | 5280 (3.5)                       | 10560 (3.5)                        |                                                             |
| Body mass index <sup>a</sup>             |                                  |                                    | 0.41                                                        |
| <18.5                                    | 1925 (1.3)                       | 4418 (1.5)                         |                                                             |
| 18.5-<25                                 | 45482 (30.5)                     | 76156 (25.5)                       |                                                             |
| 25-<30                                   | 54387 (36.4)                     | 93932 (31.5)                       |                                                             |
| 30-<35                                   | 27736 (18.6)                     | 52216 (17.5)                       |                                                             |
| 35-<40                                   | 10398 (7.0)                      | 20911 (7.0)                        |                                                             |
| 40-<45                                   | 3647 (2.4)                       | 7511 (2.5)                         |                                                             |
| ≥45                                      | 1734 (1.2)                       | 3993 (1.3)                         |                                                             |
| Unknown                                  | 3935 (2.6)                       | 39351 (13.2)                       |                                                             |
| Smoking <sup>a</sup>                     |                                  |                                    | 0.39                                                        |
| No                                       | 111269 (74.6)                    | 194333 (65.1)                      |                                                             |
| Yes                                      | 34016 (22.8)                     | 66278 (22.2)                       |                                                             |
| Unknown                                  | 3959 (2.7)                       | 37877 (12.7)                       |                                                             |
| Number of outpatient visits <sup>b</sup> |                                  |                                    | 0.49                                                        |
| 0                                        | 862 (0.6)                        | 26145 (8.8)                        |                                                             |

|                                                    |               |               |      |
|----------------------------------------------------|---------------|---------------|------|
| 1-4                                                | 33628 (22.5)  | 95907 (32.1)  |      |
| 5-10                                               | 56401 (37.8)  | 90503 (30.3)  |      |
| ≥11                                                | 58353 (39.1)  | 85933 (28.8)  |      |
| Number of emergency department visits <sup>b</sup> |               |               | 0.05 |
| 0                                                  | 121729 (81.6) | 238943 (80.1) |      |
| 1                                                  | 19135 (12.8)  | 39466 (13.2)  |      |
| ≥2                                                 | 8380 (5.6)    | 20079 (6.7)   |      |
| Number of hospitalizations <sup>b</sup>            |               |               | 0.01 |
| 0                                                  | 130826 (87.7) | 261940 (87.8) |      |
| 1                                                  | 11291 (7.6)   | 22608 (7.6)   |      |
| ≥2                                                 | 7127 (4.8)    | 13940 (4.7)   |      |
| Frailty (top quartile) <sup>b</sup>                | 37951 (25.4)  | 73969 (24.8)  | 0.01 |
| Baseline comorbidities <sup>b</sup>                |               |               |      |
| Cardiovascular disease                             | 45251 (30.3)  | 81069 (27.2)  | 0.07 |
| Diabetes                                           | 34703 (23.3)  | 69237 (23.2)  | 0.00 |
| Hypertension                                       | 73201 (49.0)  | 131033 (43.9) | 0.10 |
| Pulmonary disease                                  | 23628 (15.8)  | 41768 (14.0)  | 0.05 |
| Renal disease                                      | 18965 (12.7)  | 37487 (12.6)  | 0.00 |
| Cancer                                             | 8484 (5.7)    | 17322 (5.8)   | 0.01 |
| HIV                                                | 1201 (0.8)    | 818 (0.3)     | 0.07 |
| Autoimmune disease                                 | 7566 (5.1)    | 13681 (4.6)   | 0.02 |
| Other vaccinations <sup>b</sup>                    | 139723 (93.6) | 218851 (73.3) | 0.57 |
| Influenza vaccine                                  | 136984 (98.0) | 211906 (96.8) |      |
| PCV13/PPSV23                                       | 17920 (12.8)  | 25737 (11.8)  |      |
| Tdap                                               | 13806 (9.9)   | 17254 (7.9)   |      |

Abbreviations: PCV13, 13-valent pneumococcal conjugate vaccine; PPSV23, pneumococcal polysaccharide vaccine; RZV, recombinant zoster vaccine; Tdap, tetanus, diphtheria, acellular pertussis vaccine

<sup>a</sup> Most recent in 365 days prior to 3/1/2020

<sup>b</sup> In 365 days prior to 3/1/2020

<sup>c</sup> N/A= not applicable, for matching variable

<sup>d</sup> Potential confounders were determined by absolute standardized difference >0.1

Medical center area not shown. There were no significant differences in the distribution of the vaccinated and unvaccinated individuals across the 19 medical center areas.

**Table 2. Incidence rates and hazard ratios of COVID-19 diagnosis and hospitalization among vaccinated (at least 1 dose of RZV) versus unvaccinated individuals**

| Outcomes                 | Vaccinated<br>(N=149244) |                        |                                          | Unvaccinated<br>(N=298488) |                        |                                          | Hazard Ratio (95% CI) |                       |
|--------------------------|--------------------------|------------------------|------------------------------------------|----------------------------|------------------------|------------------------------------------|-----------------------|-----------------------|
|                          | Number of cases          | Number of person-years | Incidence per 1000 person-years (95% CI) | Number of cases            | Number of person-years | Incidence per 1000 person-years (95% CI) | Unadjusted            | Adjusted <sup>a</sup> |
| COVID-19 diagnosis       | 5951                     | 121887.27              | 48.82 (47.60-50.08)                      | 13028                      | 236826.63              | 55.01 (54.07-55.96)                      | 0.86 (0.84-0.89)      | 0.84 (0.81-0.87)      |
| COVID-19 hospitalization | 1066                     | 122689.85              | 8.69 (8.18-9.23)                         | 2765                       | 238530.10              | 11.59 (11.17-12.03)                      | 0.73 (0.68-0.79)      | 0.68 (0.64-0.74)      |

Abbreviations: COVID-19, coronavirus disease 2019; RZV, recombinant zoster vaccine

<sup>a</sup> Adjusted for covariates: body mass index, smoking, number of outpatient visits, hypertension, and other vaccinations.



**Table 3. Incidence rates and hazard ratios of COVID-19 diagnosis and hospitalization among vaccinated (2 doses of RZV) versus unvaccinated individuals**

| Outcomes                 | Vaccinated<br>(N=94895) |                        |                                          | Unvaccinated<br>(N=189790) |                        |                                          | Hazard Ratio (95% CI) |                       |
|--------------------------|-------------------------|------------------------|------------------------------------------|----------------------------|------------------------|------------------------------------------|-----------------------|-----------------------|
|                          | Number of cases         | Number of person-years | Incidence per 1000 person-years (95% CI) | Number of cases            | Number of person-years | Incidence per 1000 person-years (95% CI) | Unadjusted            | Adjusted <sup>a</sup> |
| COVID-19 diagnosis       | 3403                    | 77714.97               | 43.79 (42.34-45.28)                      | 7689                       | 150668.58              | 51.03 (49.90-52.19)                      | 0.83 (0.80-0.87)      | 0.81 (0.77-0.84)      |
| COVID-19 hospitalization | 612                     | 78164.05               | 7.83 (7.23-8.48)                         | 1676                       | 151656.50              | 11.05 (10.53-11.59)                      | 0.69 (0.63-0.76)      | 0.64 (0.58-0.70)      |

Abbreviations: COVID-19, coronavirus disease 2019; RZV, recombinant zoster vaccine

<sup>a</sup> Adjusted for covariates: body mass index, smoking, number of outpatient visits, and other vaccinations.

**Table 4. Characteristics of SARS-CoV-2 test-positive cases and test-negative controls**

|                                          | Test Positive<br>(N=75726)<br>n (%) | Test Negative<br>(N=340898)<br>n (%) | Absolute<br>Standardized<br>Difference <sup>c</sup> |
|------------------------------------------|-------------------------------------|--------------------------------------|-----------------------------------------------------|
| Age at index date, years                 |                                     |                                      | 0.31                                                |
| 50-59                                    | 37127 (49.0)                        | 122949 (36.1)                        |                                                     |
| 60-69                                    | 23618 (31.2)                        | 109724 (32.2)                        |                                                     |
| 70-79                                    | 10478 (13.8)                        | 73786 (21.6)                         |                                                     |
| ≥80                                      | 4503 (5.9)                          | 34439 (10.1)                         |                                                     |
| Sex                                      |                                     |                                      | 0.07                                                |
| Female                                   | 39368 (52.0)                        | 188539 (55.3)                        |                                                     |
| Male                                     | 36358 (48.0)                        | 152359 (44.7)                        |                                                     |
| Race/Ethnicity                           |                                     |                                      | 0.50                                                |
| Non-Hispanic White                       | 19061 (25.2)                        | 147937 (43.4)                        |                                                     |
| Non-Hispanic Black                       | 5371 (7.1)                          | 33653 (9.9)                          |                                                     |
| Hispanic                                 | 42875 (56.6)                        | 112928 (33.1)                        |                                                     |
| Non-Hispanic Asian                       | 5627 (7.4)                          | 34226 (10.0)                         |                                                     |
| Other/Unknown                            | 2792 (3.7)                          | 12154 (3.6)                          |                                                     |
| Body mass index <sup>a</sup>             |                                     |                                      | 0.32                                                |
| <18.5                                    | 337 (0.4)                           | 3860 (1.1)                           |                                                     |
| 18.5-<25                                 | 8965 (11.8)                         | 70079 (20.6)                         |                                                     |
| 25-<30                                   | 20852 (27.5)                        | 105730 (31.0)                        |                                                     |
| 30-<35                                   | 17348 (22.9)                        | 69340 (20.3)                         |                                                     |
| 35-<40                                   | 8105 (10.7)                         | 31094 (9.1)                          |                                                     |
| 40-<45                                   | 3259 (4.3)                          | 11767 (3.5)                          |                                                     |
| ≥45                                      | 1806 (2.4)                          | 6676 (2.0)                           |                                                     |
| Unknown                                  | 15054 (19.9)                        | 42352 (12.4)                         |                                                     |
| Smoking <sup>a</sup>                     |                                     |                                      | 0.24                                                |
| No                                       | 48717 (64.3)                        | 219476 (64.4)                        |                                                     |
| Yes                                      | 13358 (17.6)                        | 83795 (24.6)                         |                                                     |
| Unknown                                  | 13651 (18.0)                        | 37627 (11.0)                         |                                                     |
| Number of outpatient visits <sup>b</sup> |                                     |                                      | 0.36                                                |
| 0                                        | 9556 (12.6)                         | 23631 (6.9)                          |                                                     |
| 1-4                                      | 32985 (43.6)                        | 114891 (33.7)                        |                                                     |
| 5-10                                     | 20824 (27.5)                        | 107629 (31.6)                        |                                                     |
| ≥11                                      | 12361 (16.3)                        | 94747 (27.8)                         |                                                     |

|                                                    |              |               |      |
|----------------------------------------------------|--------------|---------------|------|
| Number of emergency department visits <sup>b</sup> |              |               | 0.14 |
| 0                                                  | 60668 (80.1) | 254199 (74.6) |      |
| 1                                                  | 10127 (13.4) | 54731 (16.1)  |      |
| ≥2                                                 | 4931 (6.5)   | 31968 (9.4)   |      |
| Number of hospitalizations <sup>b</sup>            |              |               | 0.07 |
| 0                                                  | 65804 (86.9) | 288216 (84.5) |      |
| 1                                                  | 6048 (8.0)   | 31358 (9.2)   |      |
| ≥2                                                 | 3874 (5.1)   | 21324 (6.3)   |      |
| Frailty (top quartile) <sup>b</sup>                | 13452 (17.8) | 90699 (26.6)  | 0.21 |
| Baseline comorbidities <sup>b</sup>                |              |               |      |
| Cardiovascular disease                             | 13226 (17.5) | 92145 (27.0)  | 0.23 |
| Diabetes                                           | 21328 (28.2) | 88652 (26.0)  | 0.05 |
| Hypertension                                       | 27689 (36.6) | 148543 (43.6) | 0.14 |
| Pulmonary disease                                  | 9559 (12.6)  | 57428 (16.8)  | 0.12 |
| Renal disease                                      | 6880 (9.1)   | 44884 (13.2)  | 0.13 |
| Cancer                                             | 3039 (4.0)   | 24974 (7.3)   | 0.14 |
| HIV                                                | 269 (0.4)    | 1604 (0.5)    | 0.02 |
| Autoimmune disease                                 | 2703 (3.6)   | 17717 (5.2)   | 0.08 |
| Other vaccinations <sup>b</sup>                    | 51718 (68.3) | 261421 (76.7) | 0.19 |
| Influenza vaccine                                  | 50027 (96.7) | 254312 (97.3) |      |
| PCV13/PPSV23                                       | 4558 (8.8)   | 24876 (9.5)   |      |
| Tdap                                               | 5709 (11.0)  | 27941 (10.7)  |      |
| SARS-CoV-2 test month                              |              |               | 0.87 |
| March 2020                                         | 3977 (1.2)   | 740 (1.0)     |      |
| April 2020                                         | 14834 (4.4)  | 2011 (2.7)    |      |
| May 2020                                           | 21942 (6.4)  | 1516 (2.0)    |      |
| June 2020                                          | 32736 (9.6)  | 4018 (5.3)    |      |
| July 2020                                          | 44639 (13.1) | 7440 (9.8)    |      |
| August 2020                                        | 34386 (10.1) | 2815 (3.7)    |      |
| September 2020                                     | 30468 (8.9)  | 2094 (2.8)    |      |
| October 2020                                       | 41914 (12.3) | 3151 (4.2)    |      |
| November 2020                                      | 52420 (15.4) | 10916 (14.4)  |      |
| December 2020                                      | 63582 (18.7) | 41025 (54.2)  |      |

Abbreviations: PCV13, 13-valent pneumococcal conjugate vaccine; PPSV23, pneumococcal polysaccharide vaccine; SARS-CoV-2, severe acute respiratory syndrome coronavirus 2; Tdap, tetanus, diphtheria, acellular pertussis vaccine

<sup>a</sup> Most recent in 365 days prior to test date

<sup>b</sup> In 365 days prior to test date

<sup>c</sup> Potential confounders were determined by absolute standardized difference >0.1

Medical center area not shown. There were significant differences in the distribution of the test-positive and test-negative individuals across the 19 medical center areas.

**Table 5. Odds ratio of RZV vaccination among SARS-CoV-2 test-positive cases versus test-negative controls**

| Exposure                         | Test Positive<br>(N=75726) |      | Test Negative<br>(N=340898) |      | Odds Ratio (95% CI) |                       |
|----------------------------------|----------------------------|------|-----------------------------|------|---------------------|-----------------------|
|                                  | n                          | %    | n                           | %    | Unadjusted          | Adjusted <sup>a</sup> |
| RZV (at least 1 dose) vaccinated | 6392                       | 8.4  | 44786                       | 13.1 | 0.61 (0.59-0.63)    | 0.84 (0.81-0.86)      |
| 15 days to <1 month <sup>b</sup> | 302                        | 0.4  | 1810                        | 0.5  | 0.71 (0.63-0.81)    | 0.79 (0.69-0.90)      |
| 1 to <6 months                   | 1703                       | 2.3  | 10643                       | 3.1  | 0.68 (0.65-0.72)    | 0.87 (0.82-0.92)      |
| 6 months to <1 year              | 1697                       | 2.2  | 14606                       | 4.3  | 0.50 (0.47-0.52)    | 0.83 (0.78-0.87)      |
| ≥1 year                          | 2690                       | 3.6  | 17727                       | 5.2  | 0.65 (0.62-0.68)    | 0.82 (0.79-0.86)      |
| RZV (2 doses) vaccinated         | 4108                       | 5.4  | 31359                       | 9.2  | 0.56 (0.54-0.58)    | 0.82 (0.79-0.85)      |
| RZV unvaccinated                 | 69334                      | 91.6 | 296112                      | 86.9 | N/A <sup>c</sup>    | N/A <sup>c</sup>      |

Abbreviation: RZV, recombinant zoster vaccine; SARS-CoV-2, severe acute respiratory syndrome coronavirus 2

<sup>a</sup> Adjusted for covariates age, sex, race/ethnicity, calendar time, body mass index, smoking, number of outpatient visits, number of emergency department visits, frailty, cardiovascular disease, hypertension, pulmonary disease, renal disease, cancer, other vaccinations, and medical center area.

<sup>b</sup> Time since most recent RZV vaccination

<sup>c</sup> N/A= not applicable

Figure 1: Cumulative incidence estimates of COVID-19 diagnosis by RZV (at least 1 dose) vaccination status

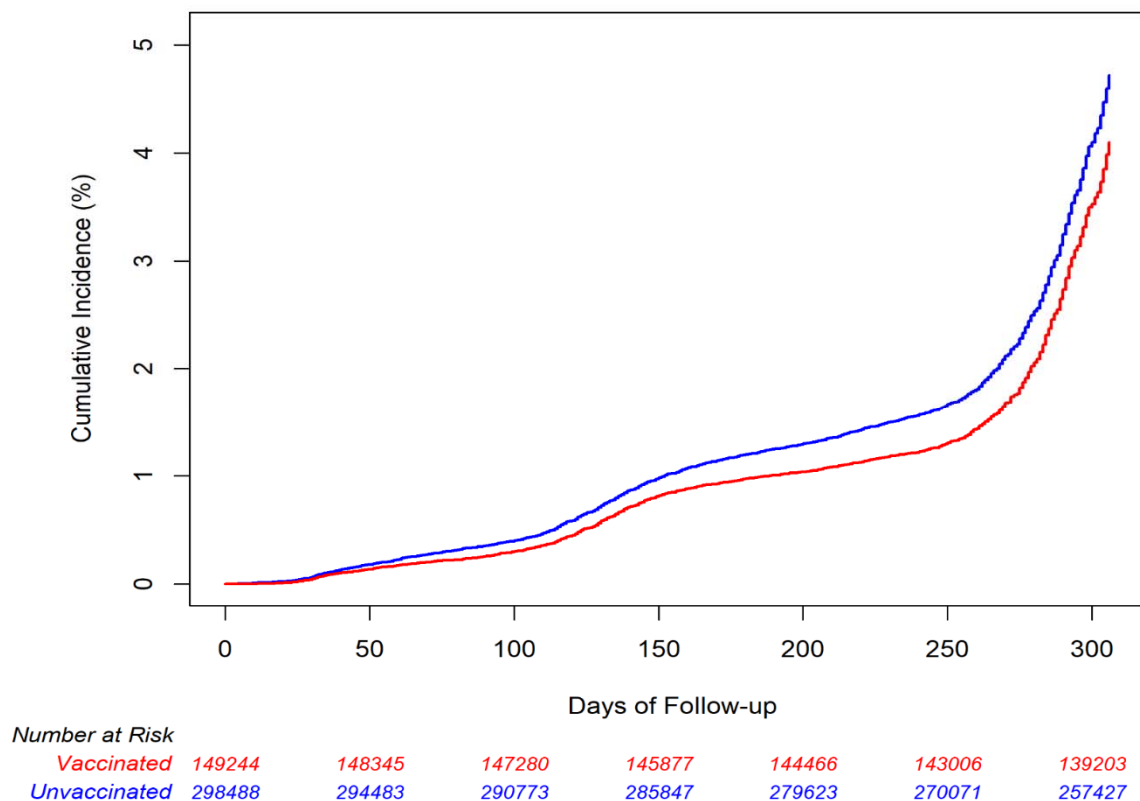

Abbreviations: COVID-19, coronavirus disease 2019; RZV, recombinant zoster vaccine

**Figure 2: Cumulative incidence estimates of COVID-19 hospitalization by RZV (at least 1 dose) vaccination status**

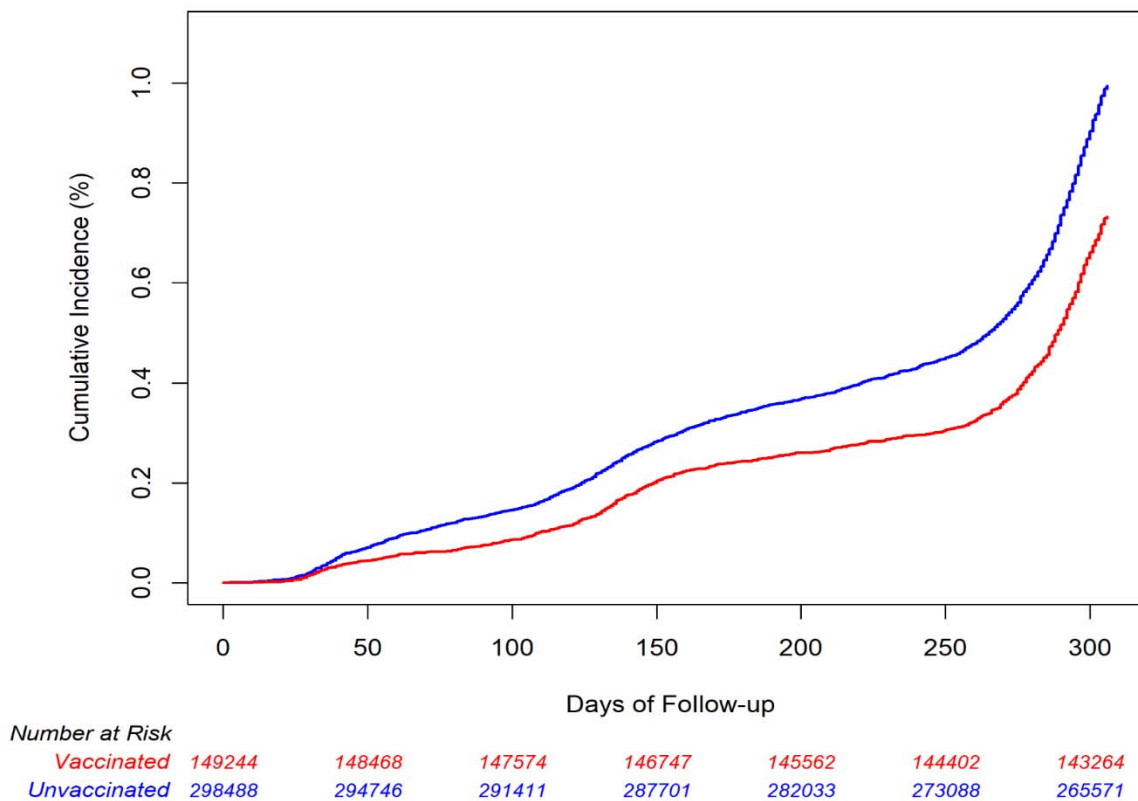

Abbreviations: COVID-19, coronavirus disease 2019; RZV, recombinant zoster vaccine
